# Supplementary material for: Two-step phosphorylation of Ana2 by Plk4 is required for the sequential loading of Ana2 and Sas6 to initiate procentriole formation
Source: Open Biol. 2017 Dec 20;7(12):170247. doi: 10.1098/rsob.170247 (PMC5746551; doi:10.1098/rsob.170247)
Supplement: List of site-directed mutagenesis primers [file rsob170247supp5.pdf]

Ana2-T6A-F: 5'- CGCTCCAAATGTTTGTTCCTCCGAAGCAGAGGATATGCTGCCCAGACTAGC -3'  
 Ana2-T6A-R: 5'- GCTAGTCTGGGCAGCATATCCTCTGCTTCGGGAACAAACATTTGGAGCG -3'  
 Ana2-S18A-F: 5'- CCCAGACTAGCGCCCAGGCCGGCAGCAGCAGTGGCCATGGGCCAC -3'  
 Ana2-S18A-R: 5'- GTGGCCCATGGGCACTGCTGCTGCCGGCCTGGGCGCTAGTCTGGG -3'  
 Ana2-T26A-F: 5'- GCAGCAGTGGCCATGGGGCCACGCAAATGAGATTATAGGGCCC -3'  
 Ana2-T26A-R: 5'- GGGCCCTATAATCTCATTGCTGCTGGCCCATGGGCACTGCTGC -3'  
 Ana2-T33A-F: 5'- ACACCAATGAGATTATAGGGCCCGCAGTGCCGGAGGTATCCATATTGTT -3'  
 Ana2-T33A-R: 5'- AACAATATGGATACCTCCGGCACTGCGGGCCCTATAATCTCATTGGTGT -3'  
 Ana2-S38A-F: 5'- TAGGGCCCACCGTGCCGGAGGTAGCAATATTGTTTGGCCAGCCGCCGCA -3'  
 Ana2-S38A-R: 5'- TCGGGCGGCTGGCCAAACAATATTGCTACCTCCGGCACGGTGGGCCCTA -3'  
 Ana2-SS62,63AA-F: 5'- CCAAATCATGCACATCAGGAGGCAGCACCTCGTGCTGCACCCACCTTC -3'  
 Ana2-SS62,63AA-R: 5'- GAAGGTGGGTGCAGCACGAGGTGCTGCCTCCTGATGTGCATGATTTGG -3'  
 Ana2-T69A-F: 5'- GGAGTCATCCCTCTGTGCTGCACCCGCATTTCGCGTCTGGAAGAAGCAAATGC -3'  
 Ana2-T69A-R: 5'- GCATTTGCTTCTTCCAGGACGCGAATGCGGGTGCAGCACGAGGGGATGACTCC -3'  
 Ana2-S72A-F: 5'- CGTGCTGCACCCACCTTCGCGGCATGGAAGAAGCAAATGCTGCCC -3'  
 Ana2-S72A-R: 5'- GGGCAGCATTGCTTCTTCCATGCCGCGAAGGTGGGTGCAGCACG -3'  
 Ana2-S84A-F: 5'- GCAAATGCTGCCCAGGGTCAACTTTGCACCCATTTTGGCCACAGAACTGGGTC -3'  
 Ana2-S84A-R: 5'- GACCCAGTTCTGTGGCCAAAATGGGTGCAAAGTTGACCCTGGGCAGCATTTCG -3'  
 Ana2-T89A-F: 5'- GGTCAACTTTTCGCCCATTTTGGCCGCAGAACTGGGTCCTCGCACCGCTCCCA -3'  
 Ana2-T89A-R: 5'- TGGGAGCGGTGCGAGGACCCAGTTCTGCGGCCAAAATGGGCGAAAAGTTGACC -3'  
 Ana2-SS98,99AA-F: 5'- CTGGGTCTCTGCACCGCTCCCGCAGCAAATAGTCCGTGCTCCTCGAAG -3'  
 Ana2-SS98,99AA-R: 5'- CTTGAGGAGCACGGACTATTTGCTGCGGGAGCGGTGCGAGGACCCAG -3'  
 Ana2-S101A-F: 5'- CGCACCGCTCCAGCAGCAATGCACCGTGCTCCTCGAAGGAATAC -3'  
 Ana2-S101A-R: 5'- GTATTCCTTCGAGGAGCACGGTGCATTGCTGCTGGGAGCGGTGCG -3'  
 Ana2-SS104,105AA-F: 5'- CCCAGCAGCAATAGTCCGTGCGCAGCAAAGGAATACCAAGTAATGCCC -3'  
 Ana2-SS104,105AA-R: 5'- GGGCATTACTTGGTATTCTTTGCTGCGCACGGACTATTGCTGCTGGG -3'  
 Ana2-119,124,125-3xA-F: 5'- GTAATGCCCCGGGATCGCAACTATGCAGCAGATGCGCAGCAGGCAGC  
 AAATCATATGAACTGCAATGCTGGTGGC -3'  
 Ana2-119,124,125-3xA-R: 5'- GCCACCAGCATTGCAGTTCATATGATTTGCTGCCTGCTGCGCATCTGC  
 TGCATAGTTGCGATCCCGGGGCATTAC -3'  
 Ana2-150-153,159-5xA-F: 5'- CAACAGGCATATCAATCTAGGCGCTTGGCAGCAGCAGCAAACGCAGAT  
 GTCCTCGCAATCTGTGCTGGCACACAGACCGATCCC -3'  
 Ana2-150-153,159-5xA-R: 5'- GGGATCGGTCTGTGTGCCAGCACAGATTGCGAGGACATCTGCGTTTG  
 CTGCTGCTGCCAAGCGCCTAGATTGATATGCCTGTTG -3'  
 Ana2-T166A-F: 5'- ACCATCTGTGCTGGCACACAGGCAGATCCCTTCAACCCATCTCCT -3'  
 Ana2-T166A-R: 5'- AGGAGATGGGTTGAAGGGATCTGCCTGTGTGCCAGCACAGATGGT -3'  
 Ana2-T172A-F: 5'- CAGACCGATCCCTTCAACCCAGCACCTCCGCGAAAATCACTGCCC -3'  
 Ana2-T172A-R: 5'- GGGCAGTGATTTTCGCGGAGGTGCTGGGTTGAAGGGATCGGTCTG -3'  
 Ana2-S177A-F: 5'- CTTCAACCCATCTCCTCCGCGAAAAGCACTGCCCCAGGTTGTCTATTCCGACA -3'  
 Ana2-S177A-R: 5'- TGTCGGAATAGACAACCTGGGGCAGTGCTTTTCGCGGAGGAGATGGGTTGAAG -3'  
 Ana2-S184A-F: 5'- AAAATCACTGCCCCAGGTTGTCTATGCAGACATCGACGTCAGCAACTTGGCCA -3'  
 Ana2-S184A-R: 5'- TGGCCAAGTTGCTGACGTCGATGTCTGCATAGACAACCTGGGGCAGTGATTTT -3'  
 Ana2-S189A-F: 5'- GGTGTCTATTCCGACATCGACGTCGAAACTTGGCCAATAAGAGTGATCTGG -3'  
 Ana2-S189A-R: 5'- CCAGATCACTCTTATTGGCCAAGTTTGCAGCGTCGATGTCGGAATAGACAACC -3'  
 Ana2-S195A-F: 5'- GTCAGCAACTTGGCCAATAAGGCAGATCTGGCGGCTCTGGTATCC -3'  
 Ana2-S195A-R: 5'- GGATACCAGAGCCGCCAGATCTGCCTTATTGGCCAAGTTGCTGAC -3'  
 Ana2-S202A-F: 5'- AGTGATCTGGCGGCTCTGGTAGCACTTGTGGAGTCCGTGCGCCAT -3'  
 Ana2-S202A-R: 5'- ATGGCGCACGGACTCCACAAGTGCTACCAGAGCCGCCAGATCACT -3'  
 Ana2-S206A-F: 5'- GCTCTGGTATCCCTTGTGGAGGCAGTGCGCCATGAGCAGCAACAG -3'  
 Ana2-S206A-R: 5'- CTGTTGCTGCTCATGGCGCACTGCCTCCACAAGGGATACCAGAGC -3'  
 Ana2-237-240,242-5xA-F: 5'- GCGAAACCCGAAGCCATTTCAAAGCCGAGCAGCAGCAGGCGCACAG  
 TGCGATATTCTGACCACCAATCAA -3'  
 Ana2-237-240,242-5xA-R: 5'- TTGATTGGTGGTCAGAATATCGCACTGTGCGCCTGCTGCTGCTGCGGCT  
 TTTGAAATGGCTTCGGGTTTCGC -3'  
 Ana2-S257A-F: 5'- AATCAAGCAGGTAGACGCTTGGCACCCATTATGCAGGATTACATA -3'  
 Ana2-S257A-R: 5'- TATGTAATCCTGCATAATGGGTGCCAAGCGTCTACCTGCTTGATT -3'

Suppl. Table 1
