# Supplementary material for: Two-step phosphorylation of Ana2 by Plk4 is required for the sequential loading of Ana2 and Sas6 to initiate procentriole formation
Source: PubMed Central journal article supplement (PMC5746551; doi:10.1098/rsob.170247), 2017-12-20
Supplement: rsob170247supp1.pdf [file rsob170247supp1.pdf]

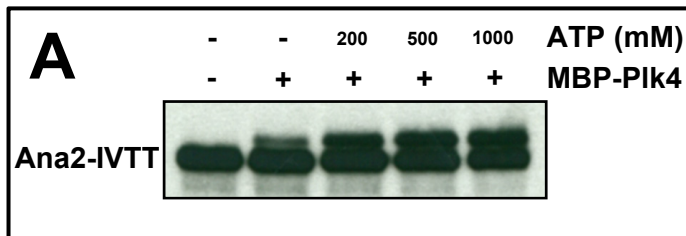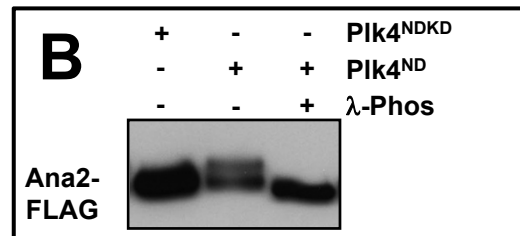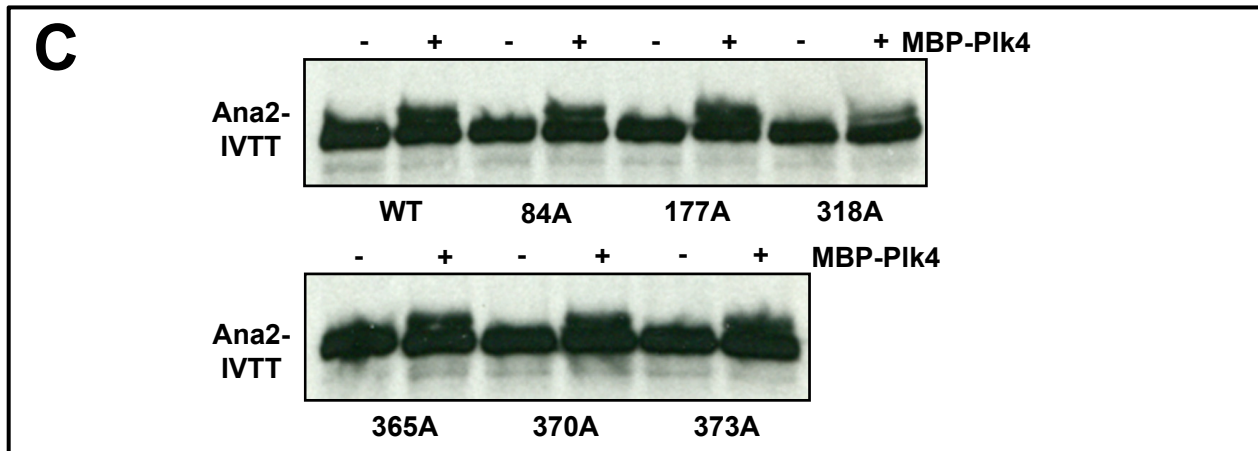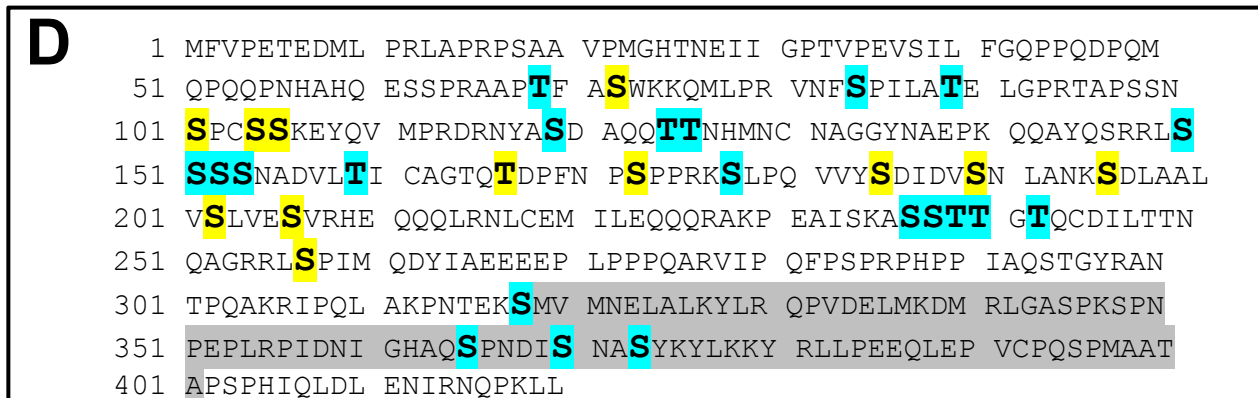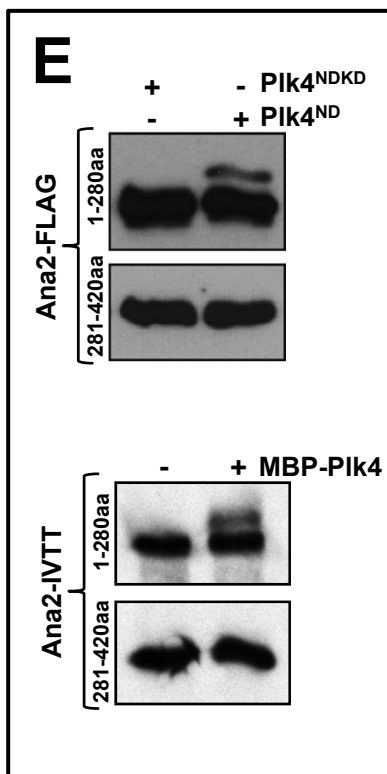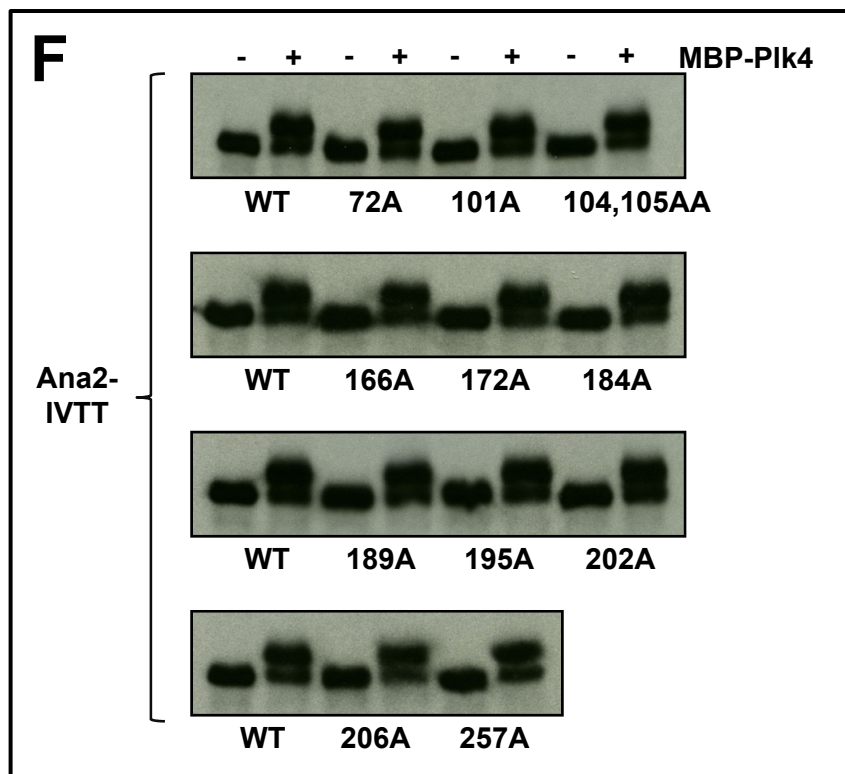

Suppl. Fig. S1
